# Supplementary material for: Efficient removal of a typical dye and Cr(vi) reduction using N-doped magnetic porous carbon
Source: Royal Society of Chemistry journal article supplement (doi:10.1039/c4ra10189h), 2014-11-04
Supplement: c4ra10189h2.pdf [file c4ra10189h2.pdf]

## **Efficient removal of typical dye and Cr(VI) reduction using N-doped magnetic porous carbon**

Shouwei Zhang,<sup>a,b</sup> Xiangxue Wang,<sup>b</sup> Jiaying Li,<sup>\*b</sup> Tao Wen,<sup>b</sup> Jinzhang Xu,<sup>\*a</sup> and Xiangke Wang<sup>\*b,c</sup>

a School of Materials Science and Engineering, Hefei University of Technology, 230031, Hefei, P. R. China

b Key Laboratory of Novel Thin Film Solar Cells, Institute of Plasma Physics, Chinese Academy of Sciences, P.O. Box 1126, Hefei, 230031, P. R. China.

c Faculty of Engineering, King Abdulaziz University, Jeddah, 21589, Saudi Arabia

E-mail: lijx@ipp.ac.cn (J. Li), xkwang@ipp.ac.cn (X. Wang)

Fax: +86-551-65591310; Tel: +86-551-65593308

### **Isotherm Model.**

The Langmuir isotherm is often applicable to a homogeneous adsorption surface with all the adsorption sites having equal adsorbate affinity and is represented by the following equation:

$$q_e = \frac{q_m b C_e}{1 + b C_e}$$

The Freundlich isotherm model assumes heterogeneity of adsorption surfaces, expressed by the following equation:

$$q_e = K_F (C_e)^n$$

where  $q_e$  and  $C_e$  are the amount of organic pollutants adsorbed per unit weight of adsorbent (mg/g) and the equilibrium concentration (mg/L), respectively;  $b$  is the constant related to the free energy of adsorption (L/mg), and  $q_m$  is the maximum adsorption capacity;  $K_F$  is the Freundlich constant indicative of the relative adsorption capacity of the adsorbent (mg/g), and  $(n)$  is the adsorption intensity.

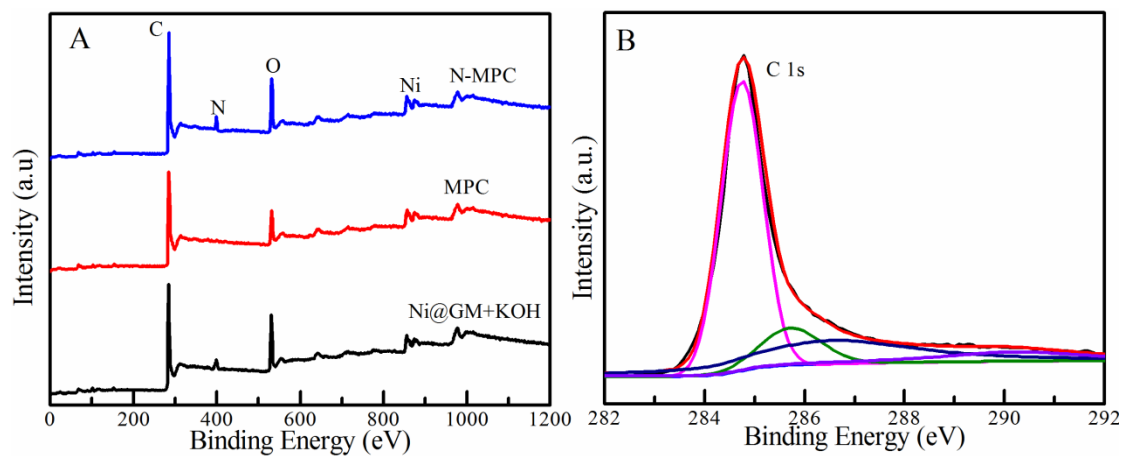

Figure S1. XPS survey spectra of as-prepared materials resulted from different experimental conditions (A) and the high resolution C 1s spectrum of N-MPC (B).

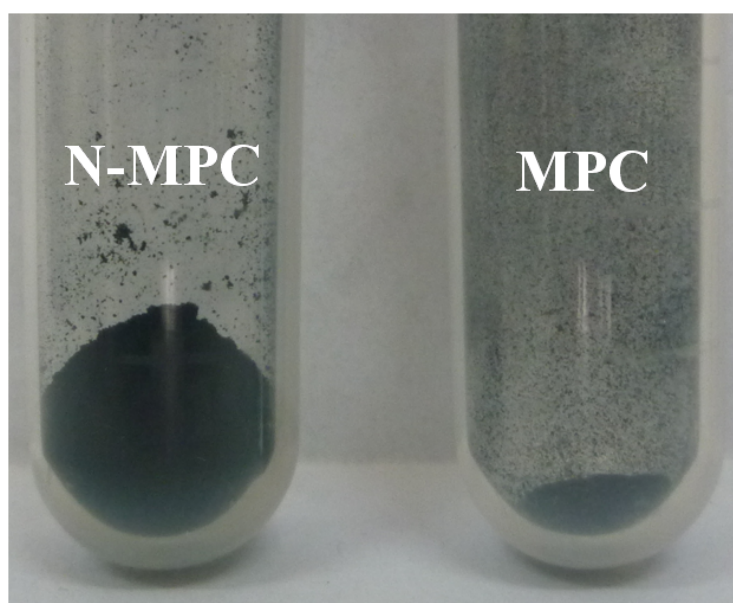

Figure S2. The digital image of 300 mg N-MPC and MPC in a plastic container.

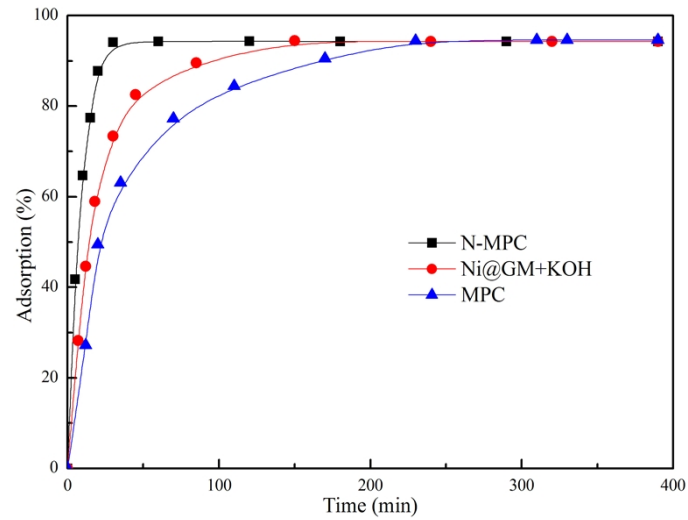

Figure S3. Effect of contact time of the removal of Cr(VI) from aqueous solutions to the three different adsorbents ( $C_{\text{adsorbent}} = 0.05 \text{ g/L}$ ,  $T = 25 \text{ }^\circ\text{C}$ ,  $C_{\text{Cr(VI)initial}} = 6.0 \text{ mg/L}$ ,  $\text{pH} \sim 2.5$ ).

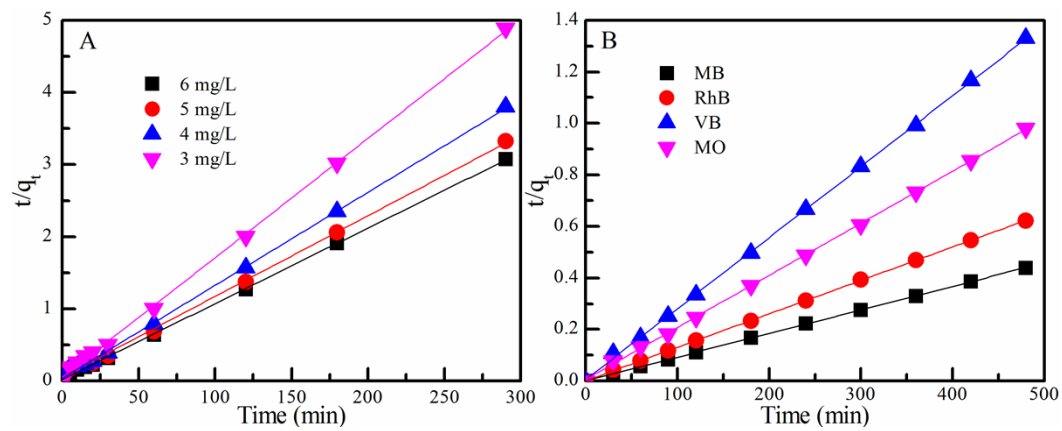

Figure S4. The pseudo-second order sorption kinetics of Cr(VI) (A) and dyes (B) onto N-MPC.

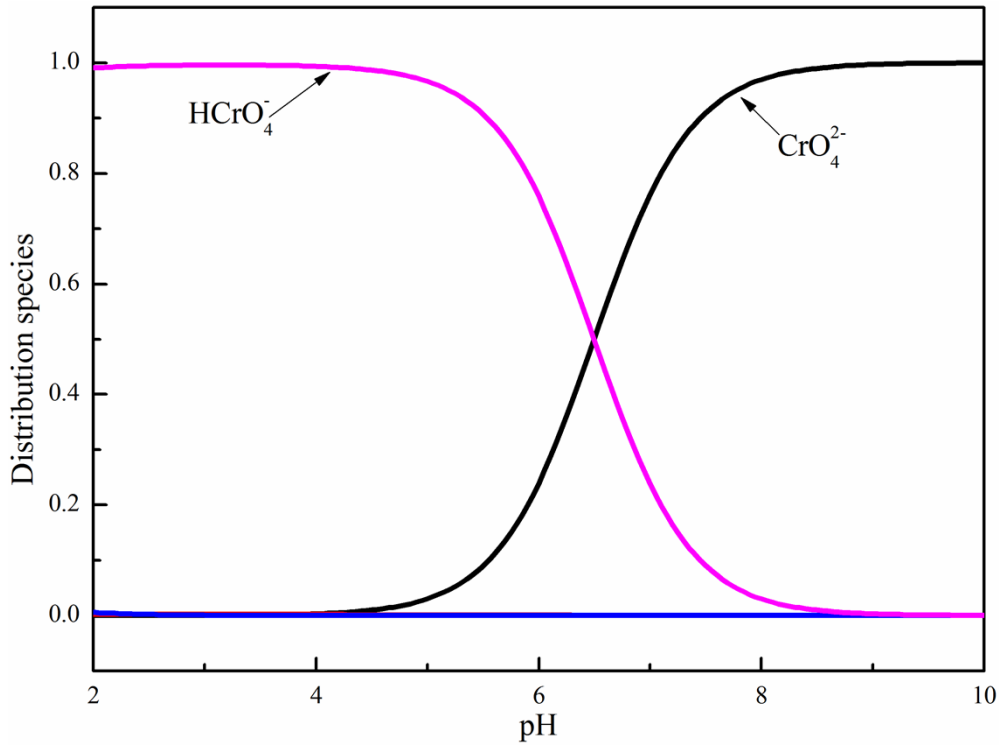

Figure S5. Relative proportion of Cr species as a function of pH values.

Brunauer-Emmett-Teller (BET) isotherm is a theoretical equation, most widely applied in the gas-solid equilibrium systems. This model assumes multilayer adsorption and was developed to describe adsorption phenomena when successive molecular layers of adsorbate form after the completion of a monolayer.

The extinction of this model to liquid-solid interface is described by Eq. (1), which is linearized in Eq. (2).

$$q_e = \frac{C_{BET} C_e q_s}{(C_s - C_e) [1 + (C_{BET} - 1) (C_e / C_s)]} \quad (1)$$

$$\frac{C_e}{(C_s - C_e) q_e} = \frac{1}{C_{BET} q_s} + \left( \frac{C_{BET} - 1}{C_{BET} q_s} \right) \left( \frac{C_e}{C_s} \right) \quad (2)$$

$q_e$  amount of adsorbate in the adsorbent at equilibrium (mg/g)

$C_e$  equilibrium concentration (mg/L)

$C_s$  adsorbate monolayer saturation concentration (mg/L)

$C_{BET}$  BET adsorption isotherm relating to the energy of surface interaction (L/mg)

$q_s$  theoretical isotherm saturation capacity (mg/g)

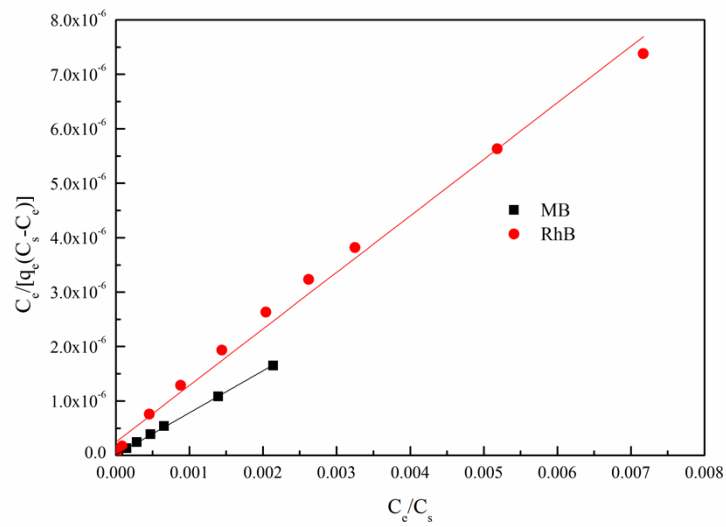

Figure S6. Linearized forms of BET model for adsorption of MB and RhB by N-MPC.

It was found that the experimental data fit the BET model isotherm well, and the correlation coefficients  $R^2$  was 0.9997 (MB) and 0.9983 (RhB), respectively. Hence, the BET model is more suitable for describe the adsorption behavior of MB and RhB over N-MPC.

Table S1. Kinetics parameters of Cr(VI) adsorption on N-MPC.

|          | The second-order kinetics |                    |                  |       |
|----------|---------------------------|--------------------|------------------|-------|
|          | $q_{exp}$ (mg/g)          | $k_2$ (g/(mg·min)) | $q_{cal}$ (mg/g) | $R^2$ |
| 6.0 mg/L | 96.27                     | 0.0023             | 95.42            | 0.999 |
| 5.0 mg/L | 90.27                     | 0.0032             | 89.45            | 0.997 |
| 4.0 mg/L | 78.33                     | 0.0044             | 77.52            | 0.999 |
| 3.0 mg/L | 59.33                     | 0.0049             | 60.42            | 0.999 |

Table S2. The adsorption capacities for different dyes on different adsorbents.

| adsorbents | MB (mg/g) | RhB (mg/g) | VB (mg/g) | MO (mg/g) |
|------------|-----------|------------|-----------|-----------|
| AC         | 330.25    | 194.32     | 157.52    | 202.76    |
| N-MPC      | 1284.09   | 819.39     | 376.29    | 565.41    |
| MPC        | 937.34    | 599.73     | 210.65    | 270.12    |
| Ni@GM+KOH  | 1054.78   | 635.24     | 270.59    | 342.81    |

Table S3. Molecular ball and spring model, molecular size for the four dyes.

| Dye | Molecular model                                                                     | Molecular size (nm) | Molecular weight (g/mol) | Nature | UV absorption (nm) |
|-----|-------------------------------------------------------------------------------------|---------------------|--------------------------|--------|--------------------|
| MB  | 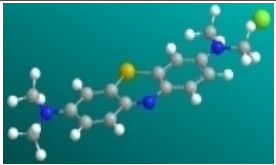   | 1.26×0.77×0.65      | 320                      | basic  | 665                |
| RhB |    | 1.59×1.18×0.56      | 478                      | basic  | 554                |
| VB  |   | 1.47×1.41×0.44      | 506                      | basic  | 603                |
| MO  |  | 1.31×0.55×0.18      | 327                      | acidic | 465                |

Table S4. Kinetics parameters for the different dyes on N-MPC.

|     | $q_{exp}$ (mg/g) | The second-order kinetics |                  |       |
|-----|------------------|---------------------------|------------------|-------|
|     |                  | $k_2$ (g/(mg·min))        | $q_{cal}$ (mg/g) | $R^2$ |
| MB  | 1091.31          | 0.00048                   | 1094.09          | 0.999 |
| RhB | 770.50           | 0.00111                   | 769.23           | 0.999 |
| VB  | 360.91           | 0.00125                   | 363.64           | 0.999 |
| MO  | 489.47           | 0.00063                   | 495.05           | 0.999 |



Table S5. Comparison of the adsorption capacities of MB, MO, RhB and CV onto various adsorbents.

| Dyes | Adsorbents                                         | Adsorption capacity (mg/g) | Ref.      |
|------|----------------------------------------------------|----------------------------|-----------|
| MB   | anaerobic granular sludge                          | 212                        | 1         |
|      | graphene/magnetite composite                       | 43.08                      | 2         |
|      | CNTs-A                                             | 400                        | 3         |
|      | copper silicate hollow spheres                     | 162                        | 4         |
|      | Metal silicate nanotubes                           | 400                        | 5         |
|      | N-MPC                                              | 1284.09                    | This work |
| MO   | hyper-cross-linked polymeric                       | 70                         | 6         |
|      | silkworm exuviae                                   | 87                         | 7         |
|      | chitosan/Fe <sub>2</sub> O <sub>3</sub> /CNTs      | 66                         | 8         |
|      | CNTs-A                                             | 149                        | 3         |
|      | N-MPC                                              | 565.41                     | This work |
| RhB  | activated carbons                                  | 400.0                      | 9         |
|      | Zeolite                                            | 37.8                       | 10        |
|      | Porous carbon                                      | 479.0                      | 11        |
|      | Carbonaceous adsorbent                             | 82.8                       | 12        |
|      | N-MPC                                              | 819.39                     | This work |
| VB   | Perlite                                            | 21.7                       | 13        |
|      | BSD                                                | 39.3                       | 14        |
|      | G-SO <sub>3</sub> H/Fe <sub>3</sub> O <sub>4</sub> | 200.6                      | 15        |
|      | N-MPC                                              | 819.39                     | This work |

1. F. F. Liu, S. X. Teng, R. H. Song and S. G. Wang, *Desalination* 2010, **263**, 11-17.
2. L. H. Ai, C. Y. Zhang and Z. L. Chen, *J. Hazard. Mater.* 2011, **192**, 1515-1524.
3. J. Ma, F. Yu, L. Zhou, L. Jin, M. X. Yang, J. S. Luan, Y. H. Tang, H. B. Fan, Z. W. Yuan and J. H. Chen, *ACS Appl. Mater. Inter.* 2012, **4**, 5749-5760.
4. Y. Q. Wang , G. Z. Wang , H. Q. Wang , W. P. Cai and L. D. Zhang, *Chem. Commun.*, 2008, 6555-6557

5. J. Qu, W. Li, C. Y. Cao, X. J. Yin, L. Zhao, J. Bai, Z. Qin and W. G. Song, *J. Mater. Chem.*, 2012, **22**, 17222.
6. J. H. Huang, K. L., Huang, S. Q., Liu, A. T., Wang, C. Yan, *Colloids Surf. A* 2008, **330**, 55-61.
7. H. Chen, J. Zhao, J. Y. Wu and G. L. Dai, *J. Hazard. Mater.* 2011, **192**, 246-254.
8. H. Y. Zhu, R. Jiang, L. Xiao, G. M. Zeng, *Bioresour. Technol.* 2010, **101**, 5063-5069.
9. S. B. Wang and Z. H. Zhu, *Dyes Pigments*, 2007, **75**, 306-314
10. S. B. Wang and Z. H. Zhu, *J. Hazard. Mater.* 2006, **136**, 946-952.
11. Y. P. Guo, J. Z. Zhao, H. Zhang, S. F. Yang, J. Qi, Z. Wang and H. D. Xu, *Dyes Pigments*, 2005, **66**, 123-128
12. A. Bhatnagar and A. K. Jain, *J. Colloid Interface Sci.*, 2005, **281**, 49-55
13. R. M. Gong, Y. Z. Suna, J. Chen, H. J. Liu and C. Yang, *Dyes Pigments* 2005, **67**, 175-181.
14. D. L. Wua, P. W. Zheng, P. R. Chang and X. F. Ma, *Chem. Eng. J.* 2011, **174**, 489-494.
15. S. Wang, J. Wei, S. S. Lv, Z. Y. Guo and F. Jiang, *CLEAN-Soil, Air, Water*, 2013, **41**, 992-1001.
